# Supplementary material
Source: Springer Nature journal article supplement (https://www.springermedizin.de/resource/supplementary/13063_2013_1938_MOESM2_ESM.pdf/9621954)
Supplement: MOESM2 [file 9621954]

Canadian REBs  
List from NCEHR: N = 252  
Additional from OHRP: N = 4

Exclude:  
-Multiple REBs from the same institution: 26

Stratum 1  
No updated contact info:  
N = 126

Established contact: 75  
-Ineligible: 24  
-Updated info: 42  
-Excluded duplicate: 8  
-Excluded pilot site: 1  
No contact: 51

Surveyed  
n = 93

Excluded:  
- Ineligible: 24  
- Undeliverable: 2

**Response rate: 18/67 = 26.9%**  
- Declined: 4  
- No response: 45  
- Respondents: 18

Stratum 2  
Updated contact info from  
OHRP: N = 104

Excluded:  
-Pilot site: 2

Surveyed  
n = 102

Excluded:  
- Ineligible: 15  
- Undeliverable: 1

**Response rate: 42/86 = 48.8%**  
- Declined: 8  
- No response: 36  
- Respondents: 42
